# Supplementary material
Source: MDPI journal article supplement (https://www.mdpi.com/2227-9040/10/1/32)
Supplement: s1 [file s1]

## Supplementary Materials

### **A Practical Hydrazine-Carbothioamide-Based Fluorescent Probe for the Detection of Zn<sup>2+</sup>: Applications to Paper Strip, Zebrafish and Water Samples**

Boeon Suh <sup>1</sup>, Dongkyun Gil <sup>1</sup>, Sojeong Yoon <sup>2</sup>, Ki-Tae Kim <sup>2,\*</sup> and Cheal Kim <sup>1,\*</sup>

<sup>1</sup> Department of Fine Chem, Seoul National University of Science and Technology, Seoul 01811, Korea; ssbbee95@naver.com (B.S.); prmodel0131@seoultech.ac.kr (D.G.)

<sup>2</sup> Department of Environment Engineering, Seoul National University of Science and Technology, Seoul 01166, Korea; sojung5571@gmail.com

\* Correspondence: ktkim@snut.ac.kr (K.-T.K.); chealkim@snut.ac.kr (C.K.); Tel.: +82-2-962-6642 (K.-T.K.); Tel.: +82-2-971-6680 (C.K.); Fax: +82-2-972-9149 (K.-T.K.)

**Table S1.** Examples of hydrazine-carbothioamide-based fluorescence chemosensors for detecting Zn<sup>2+</sup>.

| No. | Structure                                                                           | Detection Limit (μM) | Reaction Media            | Application |              |            | Ref. |
|-----|-------------------------------------------------------------------------------------|----------------------|---------------------------|-------------|--------------|------------|------|
|     |                                                                                     |                      |                           | Zebrafish   | Water Sample | Test-Strip |      |
| 1   |                                                                                     | 0.75                 | MeCN:H <sub>2</sub> O=1:9 | No          | No           | No         | [1]  |
| 2   |                                                                                     | 1.03                 | MeOH:HEPES buffer = 9:1   | No          | No           | No         | [2]  |
| 3   |                                                                                     | No data              | MeCN                      | No          | No           | No         | [3]  |
| 4   | 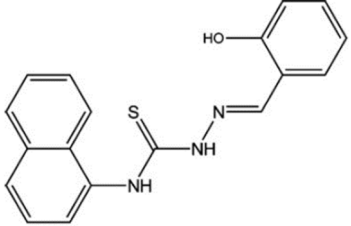 | 0.5                  | Tris-HCl:ethanol=3:7      | No          | Yes          | No         | [4]  |
| 5   |  | 0.67                 | PBS buffer                | YES         | YES          | NO         | [5]  |

|   |  |      |                 |     |     |     |           |
|---|--|------|-----------------|-----|-----|-----|-----------|
| 6 |  | 0.39 | bis-tris buffer | YES | YES | YES | This work |
|---|--|------|-----------------|-----|-----|-----|-----------|

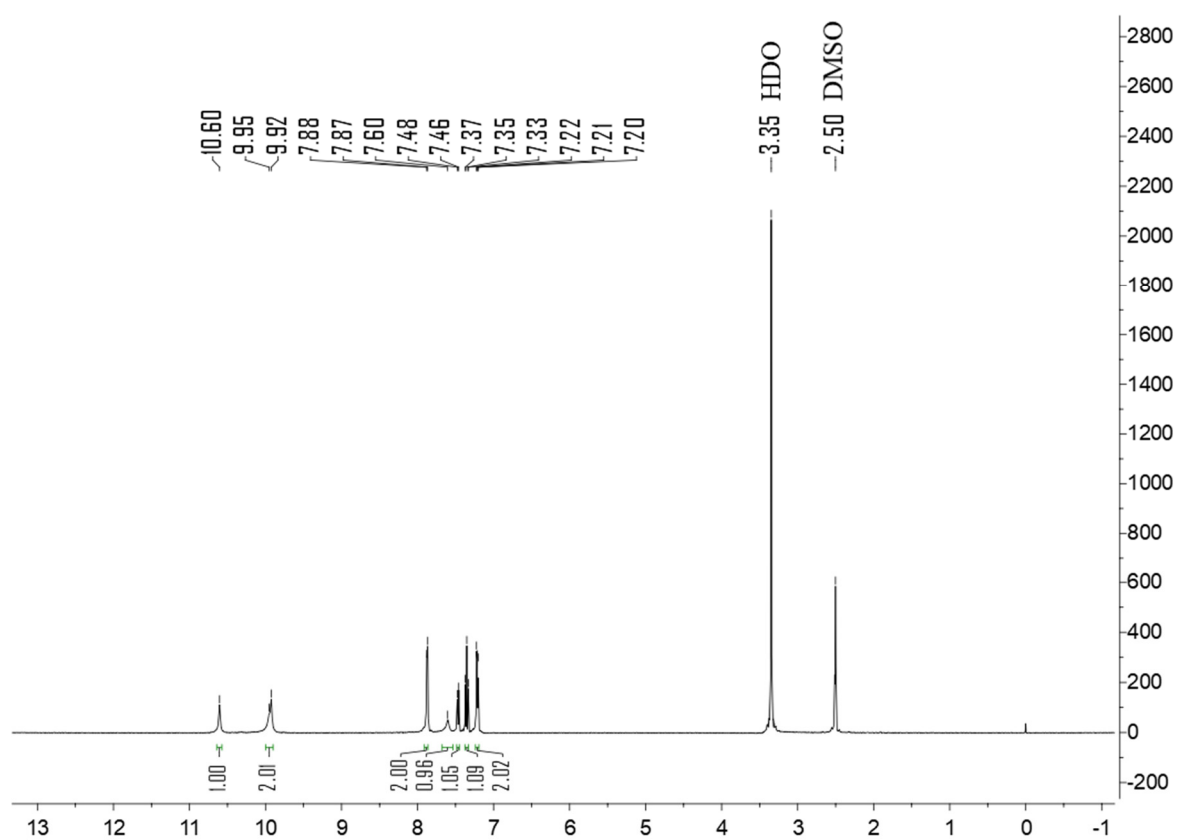

**Figure S1.** <sup>1</sup>H NMR spectrum of TCC.

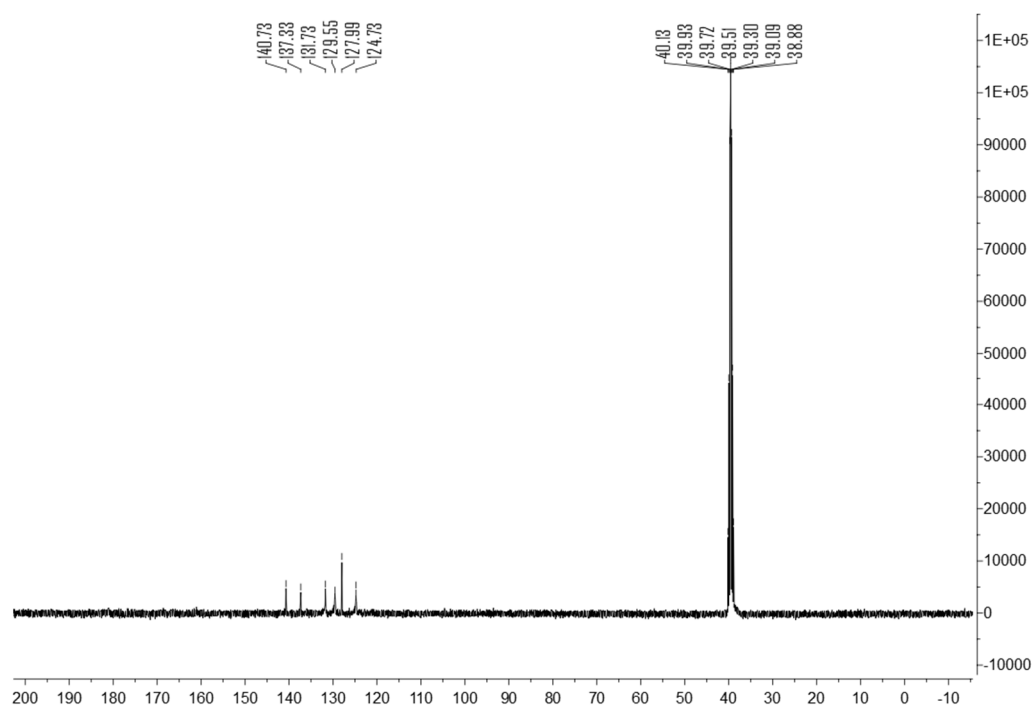

Figure S2.  $^{13}\text{C}$  NMR spectrum of TCC.

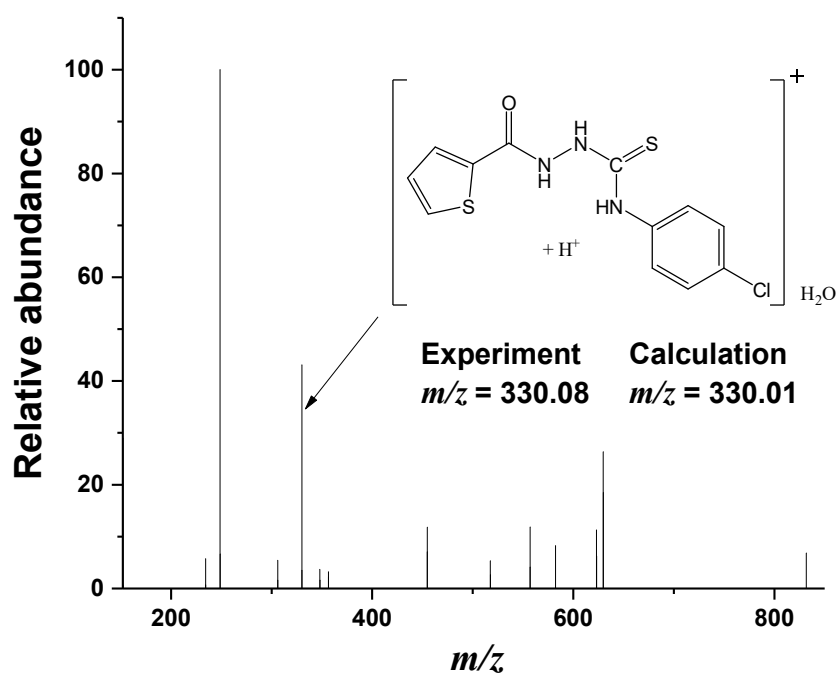

Figure S3. Positive-ion ESI-mass spectrum of TCC (100  $\mu\text{M}$ ).

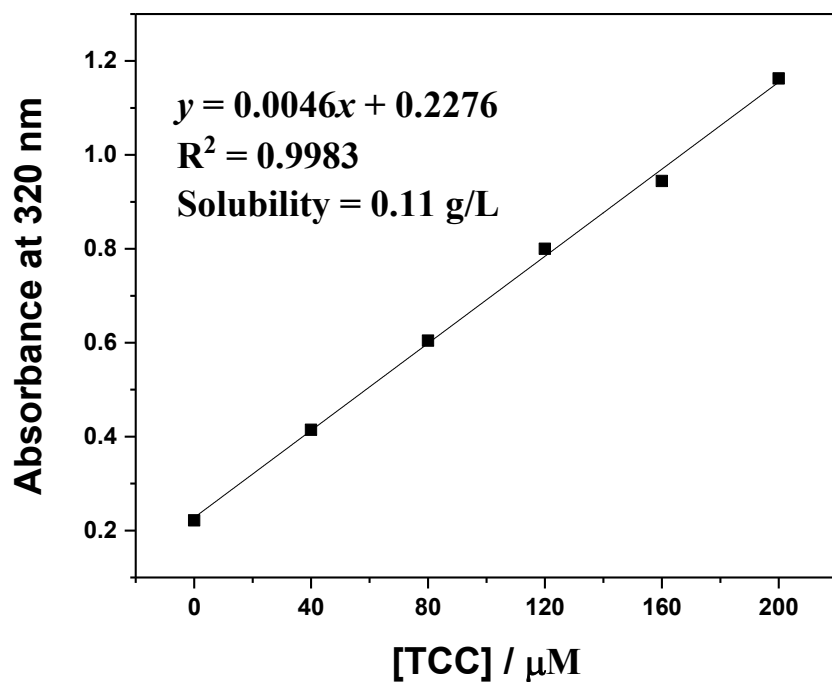

**Figure S4.** Solubility of TCC in distilled water based on the absorbance at 320 nm. Solubility was calculated to the TCC-saturated solution with linear fitting curve of TCC (0, 40, 80, 120, 160, 200  $\mu\text{M}$ ).

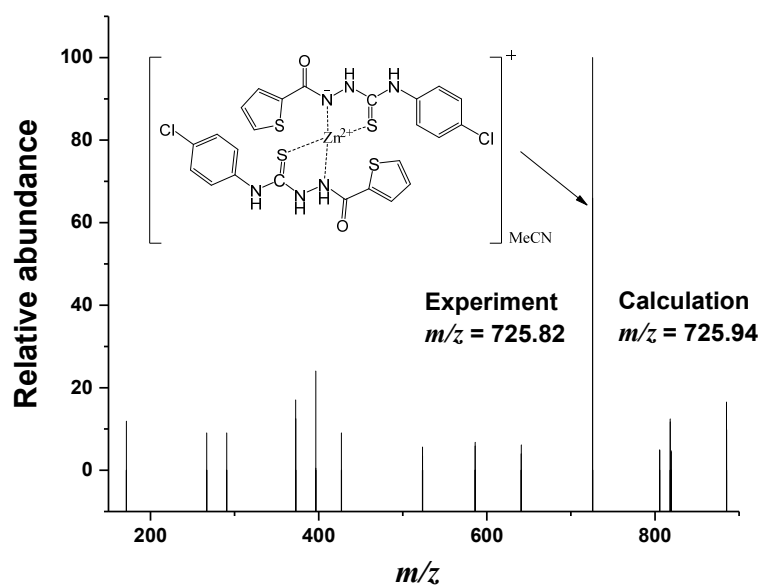

**Figure S5.** Positive-ion ESI-mass spectrum of TCC (100  $\mu\text{M}$ ) upon addition of  $\text{Zn}^{2+}$  (1 equiv).



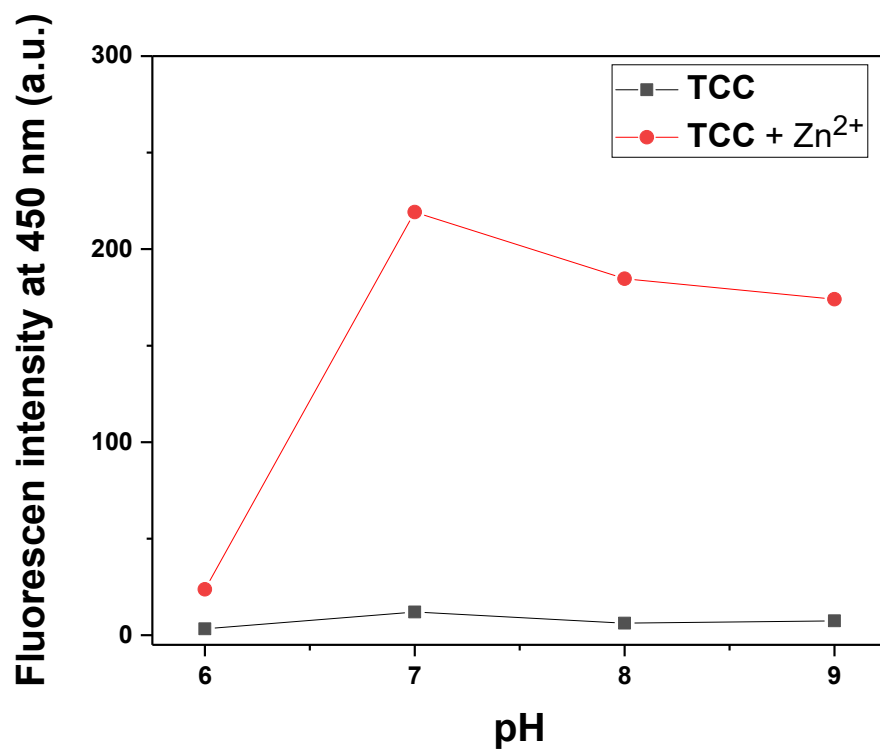

**Figure S8.** Fluorescence intensity of TCC and TCC-Zn<sup>2+</sup> at pH range of 6 to 9 ( $\lambda_{\text{ex}} = 320$  nm).

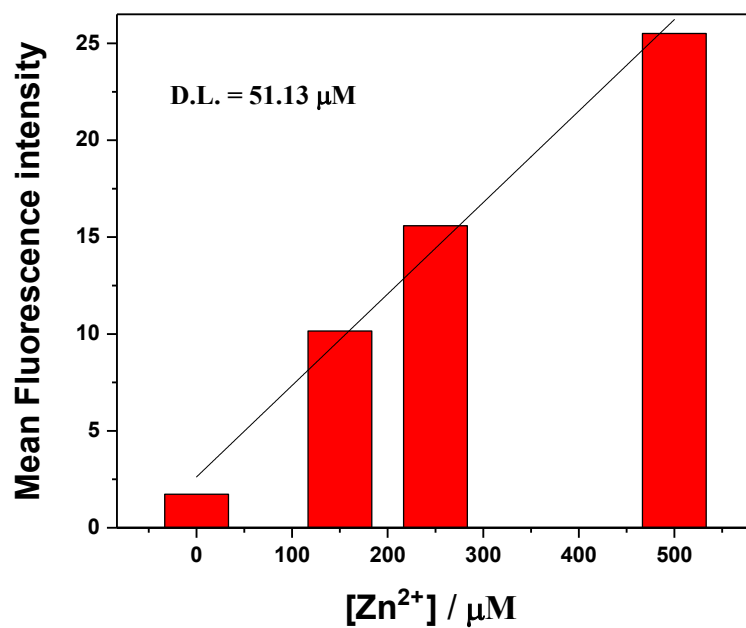

**Figure S9.** Quantification of mean fluorescence intensity in Figure 8 (a<sub>2</sub>, b<sub>2</sub>, c<sub>2</sub> and d<sub>2</sub>).

(a)

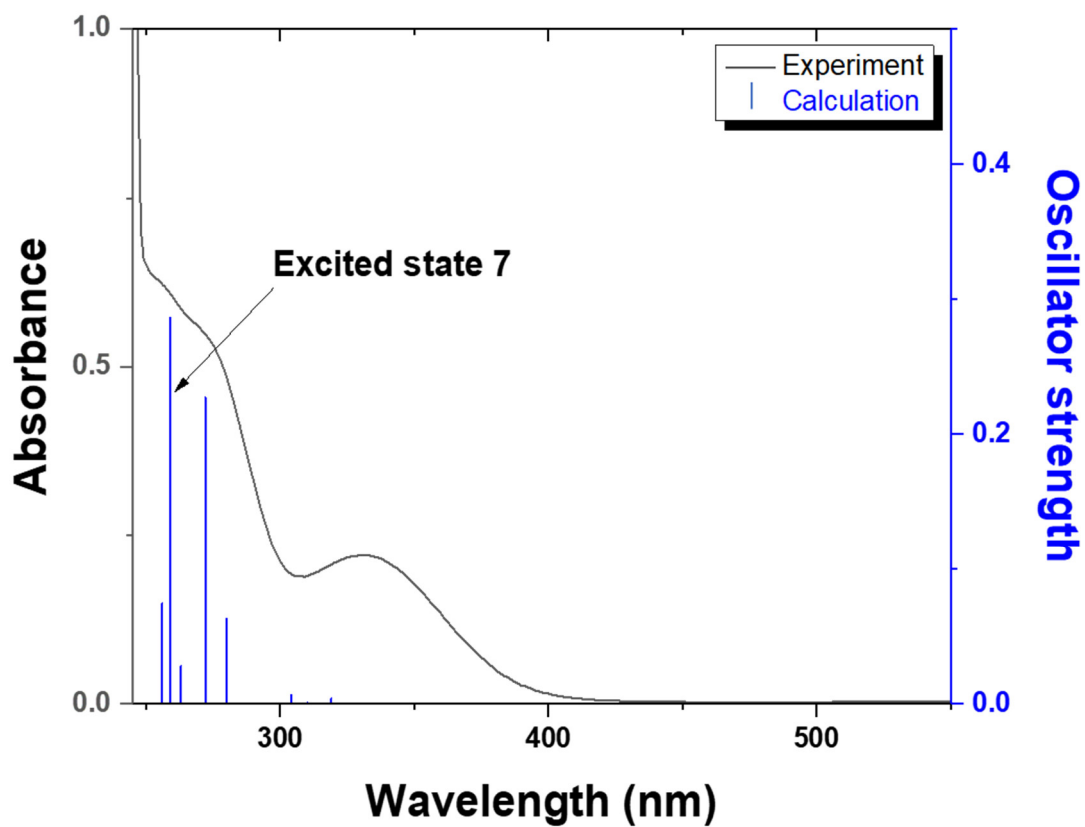

(b)

| Excited state 7     | Wavelength (nm) | Percent (%) | Main Character          | Oscillator strength |
|---------------------|-----------------|-------------|-------------------------|---------------------|
| H-3 $\rightarrow$ L | 259.1           | 61%         | $\pi \rightarrow \pi^*$ | 0.2861              |
| H-4 $\rightarrow$ L |                 | 17%         | $\pi \rightarrow \pi^*$ |                     |
| H-6 $\rightarrow$ L |                 | 13%         | $\pi \rightarrow \pi^*$ |                     |

**Figure S10.** (a) The theoretical excitation energies and the experimental UV-vis spectrum of TCC. (b) The major electronic transition energies and molecular orbital contributions of TCC.

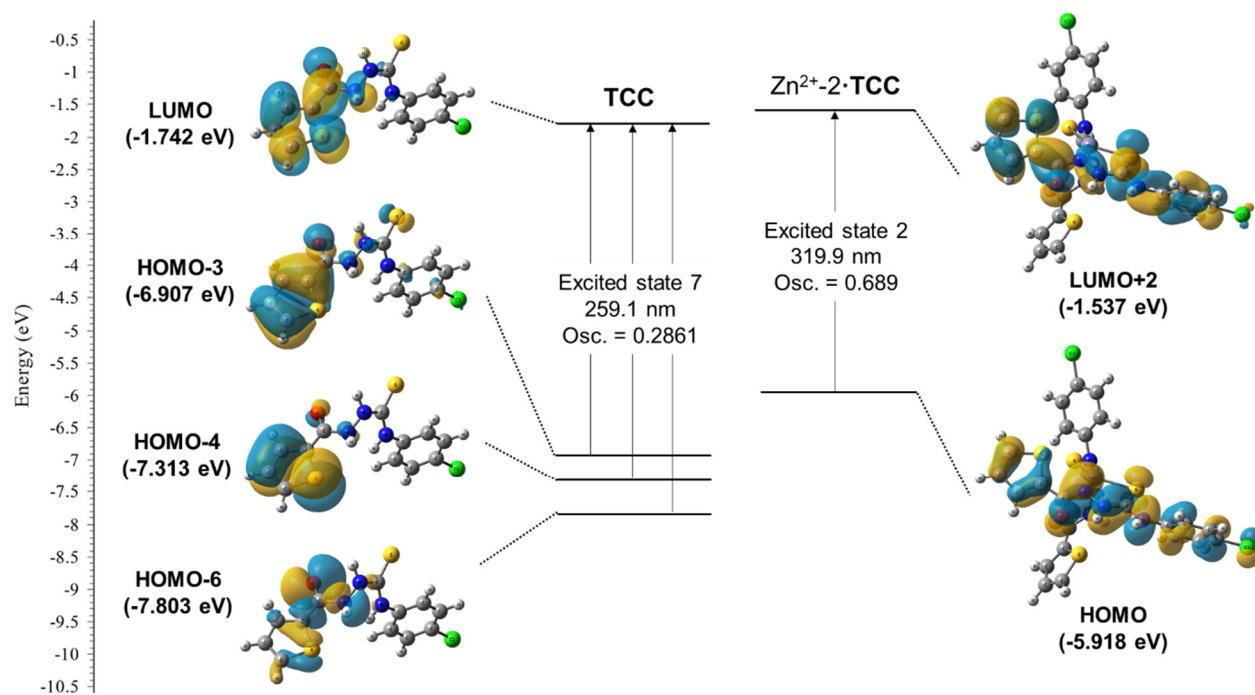

**Figure S11.** The major molecular orbital transitions and excitation energies of TCC and Zn<sup>2+</sup>-2·TCC complex.

(a)

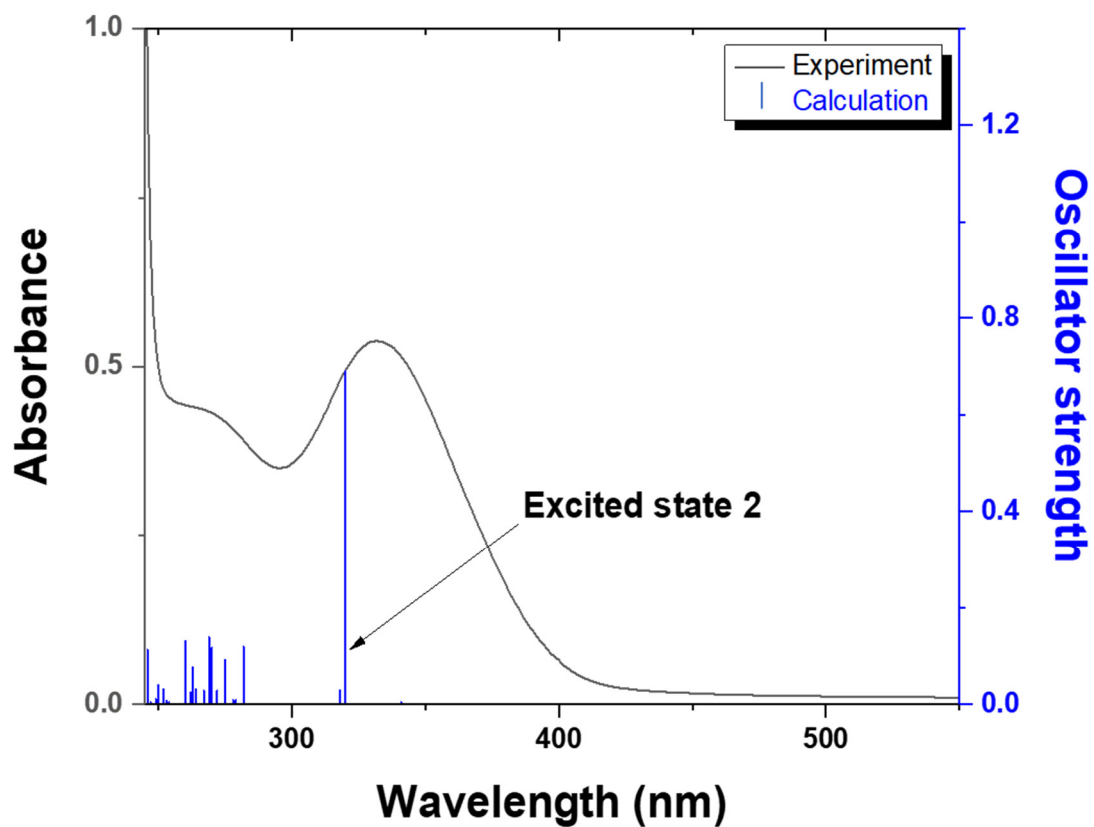

(b)

| Excited state 2 | Wavelength (nm) | Percent (%) | Main Character          | Oscillator strength |
|-----------------|-----------------|-------------|-------------------------|---------------------|
| H→ L+2          | 319.9           | 96%         | $\pi \rightarrow \pi^*$ | 0.689               |

**Figure S12.** (a) The theoretical excitation energies and the experimental UV-vis spectrum of Zn<sup>2+</sup>-2·TCC complex. (b) The major electronic transition energies and molecular orbital contributions of Zn<sup>2+</sup>-2·TCC complex.
